# Supplementary material for: Dispensations of benzodiazepines, z-hypnotics, and gabapentinoids to patients receiving opioid agonist therapy; a prospective cohort study in Norway from 2013 to 2017
Source: PubMed Central journal article supplement (PMC7183604; doi:10.1186/s12913-020-05195-5), 2020-04-25
Supplement: 12913_2020_5195_MOESM4_ESM.pdf [file 12913_2020_5195_MOESM4_ESM.pdf]

#### Additional file 4

*Diazepam equivalents* <sub>mean</sub>

$$= \text{diazepam} + \text{oxazepam} \times \frac{1}{4} + \text{alprazolam} \times \frac{40}{3} + \text{clonazepam} \times \frac{40}{3} + \text{flunitrazepam} \times \frac{40}{3} + \text{nitrazepam} + \text{zopiclone} \times \frac{8}{7} + \text{zolpidem} \times \frac{2}{3}$$

*Diazepam equivalents* <sub>lowest</sub>

$$= \text{diazepam} + \text{oxazepam} \times \frac{1}{5} + \text{alprazolam} \times 10 + \text{clonazepam} \times 10 + \text{flunitrazepam} \times 10 + \text{nitrazepam} + \text{zopiclone} + \text{zolpidem} \times \frac{1}{2}$$

*Diazepam equivalents* <sub>highest</sub>

$$= \text{diazepam} + \text{oxazepam} \times \frac{1}{3} + \text{alprazolam} \times 20 + \text{clonazepam} \times 20 + \text{flunitrazepam} \times 20 + \text{nitrazepam} + \text{zopiclone} \times \frac{4}{3} + \text{zolpidem}$$
